# Impact of Differences in Fasting Glucose and Glucose Tolerance on the Hyperbolic Relationship Between Insulin Sensitivity and Insulin Responses

KRISTINA M. UTZSCHNEIDER, MD<sup>1</sup>  
RONALD L. PRIGEON, MD<sup>2</sup>  
DARCY B. CARR, MD<sup>3</sup>  
REBECCA L. HULL, PhD<sup>1</sup>  
JENNY TONG, MD<sup>1</sup>

JANE B. SHOFR, MS<sup>4</sup>  
BARBARA M. RETZLAFF, RN<sup>1</sup>  
ROBERT H. KNOPP, MD<sup>1</sup>  
STEVEN E. KAHN, MB, CHB<sup>1</sup>

**OBJECTIVE** — To determine whether the hyperbolic relationship between insulin sensitivity and the acute insulin response to glucose (AIR<sub>g</sub>) exists in subjects with impaired fasting glucose (IFG) or decreased glucose tolerance.

**RESEARCH DESIGN AND METHODS** — We studied 219 healthy subjects (88 male and 131 female subjects, aged 26–75 years) with fasting plasma glucose (FPG) <6.11 mmol/L. Subjects underwent an intravenous glucose tolerance test to determine the insulin sensitivity index (S<sub>i</sub>), AIR<sub>g</sub>, and the glucose disappearance constant (K<sub>g</sub>), the latter a measure of intravenous glucose tolerance.

**RESULTS** — S<sub>i</sub> and AIR<sub>g</sub> were inversely related for the entire cohort, and this relationship was not significantly different from hyperbolic. The inverse relationship between S<sub>i</sub> and AIR<sub>g</sub> was not significantly different when compared between groups based on fasting glucose (normal fasting glucose [NFG], FPG <5.56 mmol/L vs. IFG, FPG 5.56–6.11 mmol/L) or by the K<sub>g</sub> quartile. However, the curve relating S<sub>i</sub> and AIR<sub>g</sub> was left shifted in the IFG compared with NFG group ( $P < 0.001$ ) and was progressively more left shifted with decreasing K<sub>g</sub> ( $P < 0.001$ ), consistent with decreasing  $\beta$ -cell function. These changes were not observed for the curves relating S<sub>i</sub> and fasting insulin, suggesting that in the fasting state  $\beta$ -cell function is maintained even in patients with mild IFG. Finally, the disposition index (DI) (S<sub>i</sub> × AIR<sub>g</sub>) was calculated as a measure of  $\beta$ -cell function. The DI progressively decreased with increasing FPG, even in the group of subjects classified as NFG.

**CONCLUSIONS** — The inverse relationship between insulin sensitivity and AIR<sub>g</sub> is consistent with a hyperbola not only in subjects with normal glucose tolerance but also with mild IFG or decreased K<sub>g</sub>. Based on a hyperbolic relationship, a decrease in  $\beta$ -cell function can be detected as FPG increases, even in patients who are normal glucose tolerant.

*Diabetes Care* 29:356–362, 2006

From the <sup>1</sup>Department of Medicine, Division of Metabolism, Endocrinology and Nutrition, VA Puget Sound Health Care System and Harborview Medical Center, University of Washington, Seattle, Washington; the <sup>2</sup>Geriatric Research, Education and Clinical Center, Baltimore VA Medical Center and Division of Gerontology, University of Maryland School of Medicine, Baltimore, Maryland; the <sup>3</sup>Department of Obstetrics and Gynecology, Division of Maternal-Fetal Medicine, University of Washington, Seattle, Washington; and the <sup>4</sup>Rehabilitation, Research and Development Center, VA Puget Sound Health Care System, Seattle, Washington.

Address correspondence and reprint requests to Kristina M. Utzschneider, MD, VA Puget Sound Health Care System (151), 1660 S. Columbian Way, Seattle, WA 98108. E-mail: kutzschn@u.washington.edu.

Received for publication 8 December 2005 and accepted in revised form 14 November 2005.

**Abbreviations:** AIR<sub>g</sub>, acute insulin response to glucose; DI, disposition index; FPG, fasting plasma glucose; IFG, impaired fasting glucose; NFG, normal fasting glucose.

A table elsewhere in this issue shows conventional and Système International (SI) units and conversion factors for many substances.

© 2006 by the American Diabetes Association.

The costs of publication of this article were defrayed in part by the payment of page charges. This article must therefore be hereby marked "advertisement" in accordance with 18 U.S.C. Section 1734 solely to indicate this fact.

Obesity has long been recognized to be associated with insulin resistance; however, the majority of obese individuals maintain normal glucose tolerance. The major reason for this maintenance of glucose tolerance is a compensatory increase in insulin secretion in response to insulin resistance, such that both basal insulin levels and stimulated insulin responses are increased (1–3). The relationship between insulin sensitivity and fasting insulin and that between insulin sensitivity and the insulin response to intravenous glucose have been demonstrated to be hyperbolic in nature compatible with a classic feedback loop (4,5).

This hyperbolic relationship between insulin sensitivity and the acute insulin response to glucose (AIR<sub>g</sub>) was first demonstrated in humans in young healthy subjects (5). Based on this hyperbolic function, the product of these two variables is a constant that is frequently called the disposition index (DI) and provides a measure of  $\beta$ -cell function. Calculation of the DI has been performed using data in subjects at high risk of developing diabetes (6–8) and to assess the impact of interventions on  $\beta$ -cell function (9,10). In these cross-sectional and longitudinal studies, many subjects demonstrated reduced glucose tolerance. While the DI was calculated in these population groups, the existence of the hyperbolic relationship that allows for this calculation under conditions of reduced glucose tolerance was not demonstrated but rather just assumed.

Thus, we sought to determine whether the hyperbolic relationship between insulin sensitivity and AIR<sub>g</sub> exists in groups of individuals who do not have normal glucose metabolism. In addition, we addressed the question as to what impact the fasting glucose level had on insulin sensitivity and  $\beta$ -cell function.

## RESEARCH DESIGN AND METHODS

We analyzed baseline data from 220 subjects with fasting plasma glucose (FPG) <6.1 mmol/L who

had previously participated in a study of the effects of insulin sensitivity on the plasma lipid profile after egg consumption (11). Subjects were otherwise healthy with no history of diabetes, dyslipidemia, uncontrolled hypertension, or vascular disease and no evidence of renal or hepatic dysfunction, uncontrolled thyroid disease, or anemia. One subject was excluded as an outlier since his fasting insulin was 3.24 SDs away from the regression line and was highly influential: exclusion of this subject did not affect the statistical conclusions. A second subject's  $\text{AIR}_g$  value was highly influential with a Cook's distance that was >50 times the average distance and was over three times higher than the second highest value. This subject was therefore excluded from regressions that involved  $\text{AIR}_g$ . All subjects gave written informed consent to participate in the study, which was approved by the human subjects review committee at the University of Washington.

### Frequently sampled intravenous glucose tolerance test

A tolbutamide-modified frequently sampled intravenous glucose tolerance test was performed as previously described (11) to quantify insulin sensitivity,  $\text{AIR}_g$ , and intravenous glucose tolerance.

### Assays

Plasma glucose was measured using the glucose oxidase method. Plasma immunoreactive insulin levels were measured using a modification of a double-antibody radioimmunoassay (12).

### Calculations

FPG and insulin values were calculated as the average of the three basal samples. The insulin sensitivity index ( $S_i$ ) was calculated using Bergman's minimal model of glucose kinetics (13).  $\text{AIR}_g$  was calculated as the mean incremental insulin response above basal between 2 and 10 min after the intravenous glucose bolus. The glucose disappearance constant ( $K_g$ ) was calculated as the slope of the natural log of glucose from 10 to 19 min, expressed as percent change per minute.  $\beta$ -Cell function was determined as the DI, which was calculated as the product of  $S_i$  and  $\text{AIR}_g$ .

### Data analysis and statistical approach

To determine whether the relationship between the dependent (fasting insulin or  $\text{AIR}_g$ ) and independent ( $S_i$ ) variable was hyperbolic ( $x \times y = \text{constant}$ ), we esti-

mated the natural logarithm ( $\ln$ ) of fasting insulin or  $\text{AIR}_g$  as a linear function of  $\ln(S_i)$  using regression. If the hyperbolic relationship exists, the slope of the regression line would be  $-1$  (5). The regression method we used corrects for the underestimation of slope when measurement error is present in both the x and y variable (14,15). Briefly, when error is present in both x and y variables, the slope that is determined by ordinary least squares regression is underestimated since ordinary least squares assumes that all error is present in the y variable. The regression method we used corrects this bias by incorporation of a factor that is the ratio of the variances of the error in the y to x variables. These error estimates for measurement of  $S_i$ ,  $\text{AIR}_g$ , and fasting insulin were based on the day-to-day coefficients of variation for these measures in our laboratory (16.9% for  $S_i$ , 20.6% for  $\text{AIR}_g$ , and 10.2% for fasting insulin [16]). A hyperbolic relationship was presumed if the  $\pm 2$  SD confidence limit of the slope included  $-1.00$ .

Slopes are expressed as the means  $\pm$  SD calculated using the bootstrap method (17). Briefly, this method estimates the statistical characteristics of a population by taking repeated samples of a population sample with replacement. For the current analysis, to determine the SD of the slope, 10,000 sets of data were randomly selected (with replacement) from the original data. The slope for each set was computed, from which the SD of these 10,000 slopes was then computed. The y-intercept was also computed from the adjusted slope value, and the y-intercept SD was computed in a similar manner.

Subjects were subdivided for analysis using three different methods: 1) by fasting glucose into normal fasting glucose (NFG) (FPG <5.6 mmol/l) and impaired fasting glucose (IFG) (FPG 5.6–6.1 mmol/l), 2) by quartiles of FPG, and 3) by quartiles of  $K_g$ .

The slopes and intercepts of the estimated regression lines when subdivided by NFG versus IFG were compared with each other using *t* tests on the adjusted slope and y-intercept values. For comparison of the  $K_g$  quartiles, ANOVA was performed. Since standard ANOVA does not incorporate the error in the independent variables, we also confirmed the ANOVA results by performing individual *t* tests on the corrected slopes and y-intercepts with Bonferroni correction (results not shown), which yielded similar results. As

the slopes were not statistically different between the groups, a common slope was used for all groups when examining differences in the y-intercepts. Residual plots for all regressions were examined and showed no evidence of heteroscedasticity, nonnormality, or lack of fit.

Comparison between groups was performed by either an independent sample *t* test or by ANOVA with Bonferroni post hoc analysis. Correlations were computed using linear regression. Data that were not normally distributed were log transformed to achieve normal distribution. Data are presented as means  $\pm$  SE, unless otherwise specified. A two-sided  $P < 0.05$  was considered significant.

## RESULTS

### Subject characteristics

The study cohort comprised 219 subjects with a broad range of age (26–75 years) and BMI (18.7–40.4 kg/m<sup>2</sup>). Further, they had broad ranges of fasting insulin (18–276 pmol/l),  $S_i$  ( $0.7\text{--}25.3 \times 10^{-5} \text{ min}^{-1}/\text{pmol/l}$ ),  $\text{AIR}_g$  (32–2638 pmol/l), DI ( $245\text{--}6461 \times 10^{-5} \text{ min}^{-1}$ ), and  $K_g$  (0.6–3.9%/min).

### Hyperbolic relationships between insulin sensitivity and fasting insulin and insulin sensitivity and $\text{AIR}_g$ in the entire cohort

For the entire cohort, there was a significant correlation between  $\ln(S_i)$  and  $\ln$ (fasting insulin) ( $r = -0.72$ ,  $P < 0.001$ ) and between  $\ln(S_i)$  and  $\ln(\text{AIR}_g)$  ( $r = -0.37$ ,  $P < 0.001$ ). The slopes for these relationships were not significantly different from  $-1$  [ $\ln(S_i)$  vs.  $\ln$ (fasting insulin) slope =  $-0.96 \pm 0.07$ ;  $\ln(S_i)$  vs.  $\ln(\text{AIR}_g)$  slope =  $-0.75 \pm 0.14$ ], consistent with a hyperbolic relationship between the two variables.

### Effect of fasting glucose on the hyperbolic relationships, insulin sensitivity, and $\beta$ -cell function

BMI and fasting insulin were higher and  $S_i$ ,  $\text{AIR}_g$ , the DI, and  $K_g$  were lower in the IFG category (Table 1). The slope for the relationship between  $\ln(S_i)$  and  $\ln$ (fasting insulin) was  $-0.99 \pm 0.09$  for NFG and  $-1.01 \pm 0.13$  for IFG. When NFG and IFG were compared, neither the slopes nor the intercepts for the relationship between  $\ln(S_i)$  and  $\ln$ (fasting insulin) differed. Thus, when the hyperbolic relationships between these two variables were plotted, the curves for both categories were superimposable (Fig. 1A).

Table 1—Characteristics of the subjects subdivided by NFG and IFG, quartile of fasting plasma glucose, and K<sub>g</sub> quartiles

| Fasting glucose range<br>(mmol/l)                            |  |             | NFG | IFG          | FPG Q1<br>(4.48–5.09)            | FPG Q2<br>(5.09–5.33)            | FPG Q3<br>(5.35–5.65)            | FPG Q4<br>(5.65–6.07)           | P values by ANOVA for glucose<br>quartiles                       |
|--------------------------------------------------------------|--|-------------|-----|--------------|----------------------------------|----------------------------------|----------------------------------|---------------------------------|------------------------------------------------------------------|
| <i>n</i>                                                     |  | 156         |     | 63           | 55                               | 55                               | 55                               | 54                              |                                                                  |
| Age (years)                                                  |  | 51.7 ± 0.8  |     | 53.3 ± 1.3   | 49.7 ± 1.2                       | 52.3 ± 1.5                       | 54.5 ± 1.5                       | 52.3 ± 1.3                      | NS                                                               |
| BMI (kg/m <sup>2</sup> )                                     |  | 25.5 ± 0.3  |     | 28.0 ± 0.5*  | 24.6 ± 0.5                       | 26.0 ± 0.6                       | 26.3 ± 0.5                       | 28.0 ± 0.5                      | <0.001, 1 vs. 4;<br><0.05, 2 vs. 4                               |
| Fasting glucose (mmol/l)                                     |  | 5.2 ± 0.02  |     | 5.8 ± 0.02*  | 4.86 ± 0.02                      | 5.21 ± 0.01                      | 5.46 ± 0.01                      | 5.83 ± 0.01                     | <0.001 for each                                                  |
| Fasting insulin (pmol/l)                                     |  | 56.1 ± 2.7  |     | 70.9 ± 4.7†  | 45.2 ± 2.8                       | 61.0 ± 5.6                       | 65.5 ± 5.0                       | 70.1 ± 4.8                      | <0.001, 1 vs. 4; <0.05, 1 vs. 3                                  |
| S <sub>i</sub> (×10 <sup>−5</sup> min <sup>−1</sup> /pmol/l) |  | 7.19 ± 0.33 |     | 4.79 ± 0.30* | 9.04 ± 0.69                      | 6.37 ± 0.40                      | 5.76 ± 0.43                      | 4.79 ± 0.33                     | ≤0.001, 1 vs. 2, 3, and 4                                        |
| AIR <sub>g</sub> (pmol/l)                                    |  | 356 ± 16    |     | 300 ± 44*    | 341 ± 25                         | 363 ± 29                         | 346 ± 25                         | 311 ± 50                        | NS                                                               |
| DI (×10 <sup>−5</sup> min <sup>−1</sup> )                    |  | 2,215 ± 104 |     | 1,132 ± 93*  | 2,623 ± 186                      | 2,028 ± 168                      | 1,798 ± 160                      | 1,151 ± 98                      | ≤0.001, 1 vs. 3 and 4 and 2 vs. 4;<br><0.05, 1 vs. 2 and 3 vs. 4 |
| K <sub>g</sub> (%/min)                                       |  | 1.83 ± 0.05 |     | 1.37 ± 0.04* | 1.98 ± 0.01                      | 1.76 ± 0.08                      | 1.66 ± 0.06                      | 1.38 ± 0.05                     | <0.001, 1 and 2 vs. 4; <0.05 1 vs.<br>3 and 3 vs. 4              |
| K <sub>g</sub> range (%/min)                                 |  |             |     |              | K <sub>g</sub> Q1<br>(0.57–1.32) | K <sub>g</sub> Q2<br>(1.33–1.59) | K <sub>g</sub> Q3<br>(1.60–1.94) | K <sub>g</sub> Q4<br>(1.95–3.9) |                                                                  |
| <i>n</i>                                                     |  | —           |     | —            | 55                               | 55                               | 55                               | 54                              |                                                                  |
| Age (years)                                                  |  | —           |     | —            | 54.3 ± 1.3                       | 53.9 ± 1.5                       | 49.2 ± 1.4                       | 51.5 ± 1.4                      | NS                                                               |
| BMI (kg/m <sup>2</sup> )                                     |  | —           |     | —            | 26.9 ± 0.6                       | 26.5 ± 0.6                       | 26.3 ± 0.5                       | 25.2 ± 0.4                      | NS                                                               |
| Fasting glucose (mmol/l)                                     |  | —           |     | —            | 5.55 ± 0.05                      | 5.44 ± 0.04                      | 5.25 ± 0.05                      | 5.14 ± 0.05                     | <0.001, 1 vs. 3 and 4 and 2 vs. 4;<br><0.05, 2 vs. 3             |
| Fasting insulin (pmol/l)                                     |  | —           |     | —            | 61.8 ± 5.9                       | 64.1 ± 5.0                       | 59.8 ± 4.5                       | 55.8 ± 3.7                      | NS                                                               |
| S <sub>i</sub> (×10 <sup>−5</sup> min <sup>−1</sup> /pmol/l) |  | —           |     | —            | 5.87 ± 0.54                      | 5.51 ± 0.43                      | 6.51 ± 0.50                      | 8.13 ± 0.57                     | <0.01, 1 and 2 vs. 4                                             |
| AIR <sub>g</sub> (pmol/l)                                    |  | —           |     | —            | 207 ± 16                         | 274 ± 19                         | 390 ± 47                         | 493 ± 30                        | <0.001, 1 and 2 vs. 4; <0.05 1 and<br>2 vs. 3                    |
| DI (×10 <sup>−5</sup> min <sup>−1</sup> )                    |  | —           |     | —            | 999 ± 81                         | 1,252 ± 72                       | 1,974 ± 101                      | 3,416 ± 180                     | <0.001 for all except NS for 1 vs. 2                             |
| K <sub>g</sub> (%/min)                                       |  | —           |     | —            | 1.11 ± 0.02                      | 1.47 ± 0.01                      | 1.75 ± 0.01                      | 2.48 ± 0.07                     |                                                                  |

Data are means  $\pm$  SE. \* $P \leq 0.001$  vs. NFG by *t* test; † $P = 0.005$ .

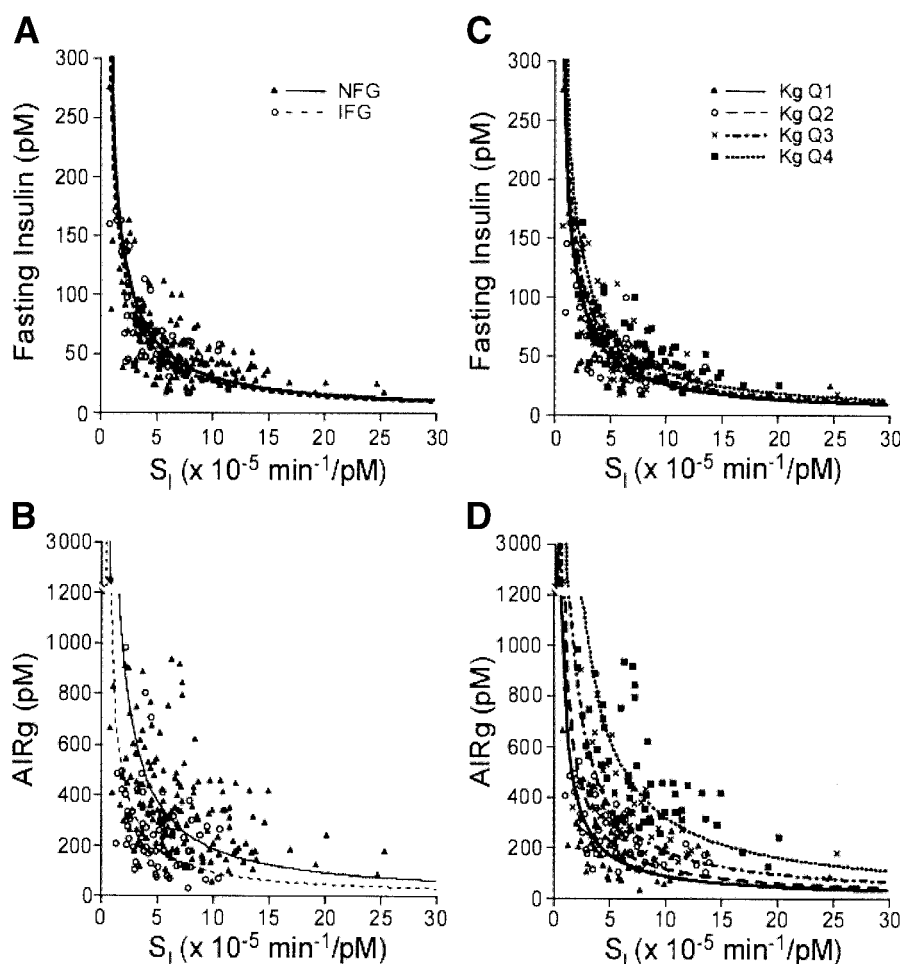

**Figure 1**—The hyperbolic relationship between fasting insulin and  $S_1$  (A) and  $AIR_g$  and  $S_1$  (B) for NFG (FPG  $<5.6$  mmol/L,  $n = 156$ ) and for IFG (5.6–6.1 mmol/L,  $n = 63$ ) and the hyperbolic relationship between fasting insulin and  $S_1$  (C) and  $AIR_g$  and  $S_1$  (D) by  $K_g$  quartile. The hyperbolic relationship between  $AIR_g$  and  $S_1$  is left and downward shifted in the IFG group compared with the NFG group and is progressively leftward and downward shifted with decreasing  $K_g$ , consistent with decreased  $\beta$ -cell function.

The slope for the relationship between  $\ln(S_1)$  and  $\ln(AIR_g)$  for NFG was  $-0.71 \pm 0.11$  and that for IFG was  $-1.30 \pm 0.34$ . Although the slope for NFG did not include  $-1$ , the slope for the entire cohort included  $-1$ , and when the slopes of the two groups were compared they were not significantly different from each other ( $P = 0.10$ ). However, the y-intercept was significantly lower in IFG compared with NFG ( $P < 0.0001$ ). Thus, when the hyperbolic curves were plotted, the curve relating  $S_1$  and  $AIR_g$  was leftward and downward shifted in the IFG group consistent with a decrease in  $\beta$ -cell function (Fig. 1B). This finding is in keeping with the lower DI in IFG (Table 1).

When the cohort was divided into quartiles by FPG,  $S_1$  decreased significantly from quartile 1 to 2 with much smaller and nonsignificant decrements in

insulin sensitivity observed between quartiles 2, 3, and 4, suggesting an early decrease in insulin sensitivity (Table 1).  $AIR_g$  failed to increase appropriately in response to this decrease in  $S_1$ , resulting in a progressive decrease in the DI (Table 1). These findings were confirmed by linear regression with both  $S_1$  [ $\ln(S_1)$  vs. FPG:  $r = -0.36$ ,  $P < 0.001$ ] and the DI [ $\ln(DI)$  vs. FPG:  $r = -0.51$ ,  $P < 0.001$ ] decreasing with increasing FPG, while there was only a weak negative correlation between  $AIR_g$  and FPG [ $\ln(AIR_g)$  vs. FPG:  $r = -0.19$ ,  $P < 0.01$ ]. As illustrated in Fig. 2, there did not appear to be a glucose threshold above which  $S_1$ ,  $AIR_g$ , and the DI declined. In fact, the greatest decrease in  $S_1$  occurred between quartiles 1 and 2, where all subjects had fasting glucose in the normal range.

### Effect of intravenous glucose tolerance on the hyperbolic relationships between insulin sensitivity and fasting insulin and insulin sensitivity and $AIR_g$

Subjects were divided into quartiles based on  $K_g$ , with group characteristics presented in Table 1. The groups did not differ by age, BMI, or fasting insulin, while decreasing  $K_g$  was associated with increasing FPG and decreasing  $S_1$ ,  $AIR_g$ , and DI.

The slopes for the relationship between  $\ln(S_1)$  and  $\ln(\text{fasting insulin})$  for each of the  $K_g$  quartiles were Q1:  $-0.99 \pm 0.12$ , Q2:  $-0.92 \pm 0.10$ , Q3:  $-1.17 \pm 0.23$ , and Q4:  $-1.03 \pm 0.18$ . There was no difference in slope for the relationship between  $\ln(S_1)$  and  $\ln(\text{fasting insulin})$  between  $K_g$  quartiles. However, a significant increase in intercept was present in the highest  $K_g$  quartile versus the other three groups ( $P = 0.02$ ). Thus, when the hyperbolic relationships between these two variables were plotted, the curves for each quartile were superimposed except for the highest  $K_g$  quartile, which was slightly higher and shifted to the right (Fig. 1C).

The slopes for the relationship between  $\ln(S_1)$  and  $\ln(AIR_g)$  for each  $K_g$  quartile were Q1:  $-0.79 \pm 0.18$ , Q2:  $-0.61 \pm 0.07$ , Q3:  $-0.92 \pm 0.20$ , and Q4:  $-0.72 \pm 0.10$ . There was no significant difference in slopes ( $P = 0.73$ ), but there were significant differences among the intercepts ( $P < 0.0001$ ), with intercept values decreasing with decreasing  $K_g$  quartile. Thus, the curve relating  $S_1$  and  $AIR_g$  shifted progressively leftward and downward with decreasing  $K_g$ , consistent with decreasing  $\beta$ -cell function (Fig. 1D). In keeping with this shift in the hyperbolic curves, the DI decreased progressively with decreasing  $K_g$  ( $r = 0.744$ ,  $P < 0.001$ ).

**CONCLUSIONS**—While a hyperbolic relationship between insulin sensitivity and insulin responses has previously been shown in a young healthy population (5), the present study extends this previous analysis by demonstrating that a similar inverse relationship exists between insulin sensitivity and insulin responses in subjects with abnormal glucose metabolism. We found no significant difference in the slopes for the relationship between  $\ln(S_1)$  and  $\ln(\text{fasting insulin})$  and between  $\ln(S_1)$  and  $\ln(AIR_g)$  between subjects with NFG and those with mild IFG (FPG between 5.6 and 6.1 mmol/L;



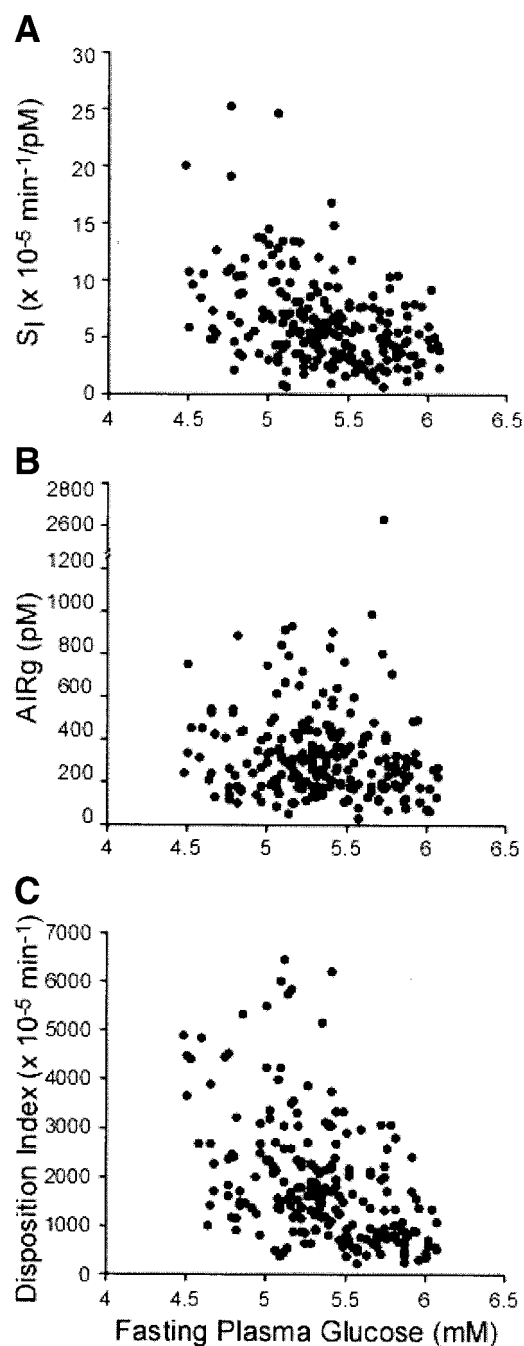

**Figure 2**—Plots of fasting plasma glucose versus  $S_I$  (A),  $\text{AIR}_g$  (B), and the DI (C) for the entire cohort demonstrate progressive decreases in both  $S_I$  and the DI as fasting glucose increases, even in NFG subjects.

100 and 110 mg/dl) and between subjects when divided into quartiles by intravenous glucose tolerance ( $K_g$ ). These findings support the hypothesis that the relationship between insulin sensitivity and  $\text{AIR}_g$  is similar in subjects with normal and abnormal glucose metabolism. Based on a hyperbolic relationship, use of the DI (when considering  $S_I$  and  $\text{AIR}_g$ ) as a measure of  $\beta$ -cell function can provide a means to assess physiology and pathophysiology in population groups within these ranges of fasting glucose and glucose tolerance. Using this approach, we

demonstrate a progressive impairment in  $\beta$ -cell function with increasing fasting glucose, even in subjects considered to be normal.

The concept of interpreting insulin responses in light of the prevailing level of insulin sensitivity is an important one. If this is not done, erroneous conclusions may be drawn. For example, an obese insulin-resistant subject with IGT may have a higher  $\text{AIR}_g$  than a lean insulin-sensitive subject. However, based on the inverse relationship between insulin sensitivity and  $\text{AIR}_g$ , calculation of the DI demon-

strates that the greater insulin response in the obese insulin-resistant subject is not adequate to fully compensate for the lower insulin sensitivity. Thus, evaluation of  $\beta$ -cell function in subjects with normal and abnormal glucose metabolism requires knowledge of the prevailing insulin sensitivity.

In addition to determining the effect of differences in fasting glucose status on the hyperbolic relationship, we assessed the relationship between increased fasting glucose as a continuous variable and measures of insulin sensitivity and  $\beta$ -cell function. With increasing fasting glucose,  $S_I$  decreases progressively but  $\text{AIR}_g$  fails to increase appropriately. Thus, a progressive decrease in the DI occurs. This finding is of interest, as it suggests that there is no definite threshold of fasting glucose at which reductions in  $\beta$ -cell function occur. This is in contrast to the findings of Godsland et al. (18) who observed that  $\text{AIR}_g$  declined above a fasting glucose between 4.97 and 5.42 mmol/l. In keeping with the results of our study, others using both intravenous (19,20) and oral glucose tolerance test methods (21) found decreases in insulin responses adjusted for insulin sensitivity in subjects with higher fasting glucose levels that were still well within the normal range. These findings taken together suggest the possibility that even in subjects with normal fasting glucose levels, higher fasting glucose levels are associated with decreased insulin sensitivity and an inadequate compensatory insulin response. Thus, the underlying physiology that eventually leads to IGT and type 2 diabetes may be manifest much earlier than defined by the current clinical criteria for IFG.

It should be recognized that this approach using the DI to provide a measure of  $\beta$ -cell function will not be useful in groups of subjects lacking a first-phase insulin response. It is well recognized that  $\text{AIR}_g$  is typically absent in individuals with type 2 diabetes (22,23), and it has been shown that this response is lacking when fasting glucose exceeds 6.4 mmol/l (115 mg/dl) (23). Given the selection criteria for our cohort, which excluded subjects with diabetes and subjects with a fasting glucose  $>6.1$  mmol/l, we cannot be certain that the hyperbolic relationship between  $S_I$  and  $\text{AIR}_g$  exists at higher glucose levels or in subjects with diabetes. However, we believe it would be unlikely given the lack of an  $\text{AIR}_g$  in subjects with fasting glucose  $>6.4$  mmol/l. The hyperbolic relationship has also been shown to

exist for certain other measures of insulin release, including the glucose potentiation slope and the maximal insulin secretory response to arginine ( $\text{AIR}_{\text{max}}$ ) (5). While we did not assess these parameters in this study, glucose potentiation is still present in subjects with diabetes (24,25). Therefore, the hyperbolic relationship between  $S_i$  and  $\text{AIR}_{\text{max}}$  probably still exists in these subjects and thus could provide a measure of  $\beta$ -cell function in these groups.

In the current study, the overall slope of  $\ln(S_i)$  versus  $\ln(\text{AIR}_g)$  was not different from  $-1.0$ , indicating that the relationship was not significantly different from a hyperbola. Other investigators have provided study results that indicate that this relationship is not hyperbolic (26). However, as with any mathematical model, deviations from the model may reflect either analytical problems or complexities in the underlying physiology that are not fully accounted for by the model. One of the analytical problems that other investigators (26) have not considered is the fact that there is measurement error in both variables. When there is measurement error in both the dependent ( $y$ ) and predictor ( $x$ ) variables, the use of ordinary least squares that assumes measurement error in only the dependent variable results in the slope of the regression line being underestimated. For example, using the present data, the unadjusted slope for  $\ln(\text{insulin sensitivity})$  versus  $\ln(\text{fasting insulin})$  was  $-0.61$  without correction and  $-0.96$  with correction. Additionally, when the data are inherently noisy and a substantial portion of the error is in the independent variable, small changes in the error estimates can have dramatic effects on the slope.

In summary, we have demonstrated that the inverse relationships between  $S_i$  and both fasting insulin and  $\text{AIR}_g$  are not significantly different from a hyperbola in subjects with mild IFG and those with reduced glucose tolerance. Based on these findings, the product of  $\text{AIR}_g$  and insulin sensitivity, which is known as the DI, provides a good measure of  $\beta$ -cell function and is applicable in patients with normal glucose tolerance or mild IFG. Thus, use of the DI may help to identify individuals at increased risk of developing diabetes and to assess the impact of interventions that are anticipated to change glucose tolerance.

**Acknowledgments**—This work was supported in part by the Medical Research Service

and the Geriatric Research, Education and Clinical Center of the Department of Veteran Affairs; the American Egg Board; National Institutes of Health Grants DK-02456, DK-02654, DK-17047, DK-35747, DK-35816, DK-59417, HL-30086, HL-07028, RR-37, and RR-16066; the American Diabetes Association; the U.S. Department of Agriculture; and the McMillen Family Trust.

We thank the subjects, Diane Collins and the nursing staff of the General Clinical Research Center at the University of Washington, and the staff of the Immunoassay Core of the Diabetes Endocrinology Research Center.

## References

1. Boden G, Chen X, DeSantis RA, Kendrick Z: Effects of age and body fat on insulin resistance in healthy men. *Diabetes Care* 16:728–733, 1993
2. Carey DG, Jenkins AB, Campbell LV, Freund J, Chisholm DJ: Abdominal fat and insulin resistance in normal and overweight women: direct measurements reveal a strong relationship in subjects at both low and high risk of NIDDM. *Diabetes* 45:633–638, 1996
3. Abate N, Garg A, Peshock RM, Stray-Gundersen J, Grundy SM: Relationships of generalized and regional adiposity to insulin sensitivity in men. *J Clin Invest* 96: 88–98, 1995
4. Bergman RN, Phillips LS, Cobelli C: Physiologic evaluation of factors controlling glucose tolerance in man: measurement of insulin sensitivity and  $\beta$ -cell glucose sensitivity from the response to intravenous glucose. *J Clin Invest* 68:1456–1467, 1981
5. Kahn SE, Prigeon RL, McCulloch DK, Boyko EJ, Bergman RN, Schwartz MW, Neifing JL, Ward WK, Beard JC, Palmer JP, et al.: Quantification of the relationship between insulin sensitivity and  $\beta$ -cell function in human subjects: evidence for a hyperbolic function. *Diabetes* 42:1663–1672, 1993
6. Ehrmann DA, Sturis J, Byrne MM, Karri-son T, Rosenfield RL, Polonsky KS: Insulin secretory defects in polycystic ovary syndrome: relationship to insulin sensitivity and family history of non-insulin-dependent diabetes mellitus. *J Clin Invest* 96:520–527, 1995
7. Buchanan TA, Xiang AH, Peters RK, Kjos SL, Marroquin A, Goico J, Ochoa C, Tan S, Berkowitz K, Hodis HN, Azen SP: Preservation of pancreatic  $\beta$ -cell function and prevention of type 2 diabetes by pharmacological treatment of insulin resistance in high-risk Hispanic women. *Diabetes* 51: 2796–2803, 2002
8. Elbein SC, Wegner K, Kahn SE: Reduced  $\beta$ -cell compensation to the insulin resistance associated with obesity in members of Caucasian familial type 2 diabetic kindreds. *Diabetes Care* 23:221–227, 2000
9. Rosenfalck AM, Hendel H, Rasmussen MH, Almdal T, Anderson T, Hilsted J, Madsbad S: Minor long-term changes in weight have beneficial effects on insulin sensitivity and  $\beta$ -cell function in obese subjects. *Diabetes Obes Metab* 4:19–28, 2002
10. Utzschneider KM, Carr DB, Barsness SM, Kahn SE, Schwartz RS: Diet-induced weight loss is associated with an improvement in  $\beta$ -cell function in older men. *J Clin Endocrinol Metab* 89:2704–2710, 2004
11. Knopp RH, Retzlaff B, Fish B, Walden C, Wallick S, Anderson M, Aikawa K, Kahn SE: Effects of insulin resistance and obesity on lipoproteins and sensitivity to egg feeding. *Arterioscler Thromb Vasc Biol* 23: 1437–1443, 2003
12. Morgan C, Lazarow A: Immunoassay of insulin: two antibody systems. *Diabetes* 12:115–126, 1963
13. Bergman RN, Ider YZ, Bowden CR, Cobelli C: Quantitative estimation of insulin sensitivity. *Am J Physiol* 236:E667–E677, 1979
14. Madansky A: The fitting of straight lines when both variables are subject to error. *J Am Stat Soc* 54:173–205, 1959
15. Riggs DS, Guarnieri JA, Addelman S: Fitting straight lines when both variables are subject to error. *Life Sci* 22:1305–1360, 1978
16. Abbate SL, Fujimoto WY, Brunzell JD, Kahn SE: Effect of heparin on insulin-glucose interactions measured by the minimal model technique: implications for reproducibility using this method. *Metabolism* 42:353–357, 1993
17. Efron B, Tibshirani R: Statistical data analysis in the computer age. *Science* 253: 390–395, 1991
18. Godsland IF, Jeffs JA, Johnston DG: Loss of  $\beta$ -cell function as fasting glucose increases in the non-diabetic range. *Diabetologia* 47:1157–1166, 2004
19. Tripathy D, Eriksson KF, Orho-Melander M, Fredriksson J, Ahlqvist G, Groop L: Parallel manifestation of insulin resistance and  $\beta$ -cell decompensation is compatible with a common defect in type 2 diabetes. *Diabetologia* 47:782–793, 2004
20. Stumvoll M, Tataranni PA, Stefan N, Voarova B, Bogardus C: Glucose allostasis. *Diabetes* 52:903–909, 2003
21. Piche ME, Arcand-Bosse JF, Despres JP, Perusse L, Lemieux S, Weisnagel SJ: What is a normal glucose value? Differences in indexes of plasma glucose homeostasis in subjects with normal fasting glucose. *Diabetes Care* 27:2470–2477, 2004
22. Perley MJ, Kipnis DM: Plasma insulin responses to oral and intravenous glucose: studies in normal and diabetic subjects. *J Clin Invest* 46:1954–1962, 1967
23. Brunzell JD, Robertson RP, Lerner RL, Hazzard WR, Ensink JW, Bierman EL, Porte D Jr: Relationships between fasting plasma glucose levels and insulin secre-

- tion during intravenous glucose tolerance tests. *J Clin Endocrinol Metab* 42:222–229, 1976
24. Halter JB, Graf RJ, Porte D Jr: Potentiation of insulin secretory responses by plasma glucose levels in man: evidence that hyperglycemia in diabetes compensates for impaired glucose potentiation. *J Clin Endocrinol Metab* 48:946–954, 1979
25. Ward WK, Bolgiano DC, McKnight B, Halter JB, Porte D Jr: Diminished  $\beta$ -cell secretory capacity in patients with noninsulin-dependent diabetes mellitus. *J Clin Invest* 74:1318–1328, 1984
26. Ferrannini E, Mari A:  $\beta$ -cell function and its relation to insulin action in humans: a critical appraisal. *Diabetologia* 47:943–956, 2004
